# Supplementary material for: Optoelectronic Enhancement of Perovskite Solar Cells through the Incorporation of Plasmonic Particles
Source: MDPI journal article supplement (doi:10.3390/mi13070999), 2022-06-25
Supplement: s1 [file s1]

# Optoelectronic Enhancement of Perovskite Solar Cells through the Incorporation of Plasmonic Particles

Mohamed Salleh Mohamed Saheed <sup>1,2</sup>, Norani Muti Mohamed <sup>1,2</sup>, Balbir Singh Mahinder Singh <sup>1,2</sup>, Mohamed Shuaib Mohamed Saheed <sup>1,3,\*</sup> and Rajan Jose <sup>4,5,\*</sup>

- <sup>1</sup> Centre of Innovative Nanostructures and Nanodevices (COINN), Universiti Teknologi PETRONAS, Seri Iskandar 32610, Malaysia; mohamed.salleh87@gmail.com (M.S.M.S.); noranimuti\_mohamed@utp.edu.my (N.M.M.); balbir@utp.edu.my (B.S.M.S.)
  - <sup>2</sup> Department of Fundamental and Applied Sciences, Universiti Teknologi PETRONAS, Seri Iskandar 32610, Malaysia
  - <sup>3</sup> Department of Mechanical Engineering, Universiti Teknologi PETRONAS, Seri Iskandar 32610, Malaysia
  - <sup>4</sup> Center for Intelligent Materials, Universiti Malaysia Pahang, Kuantan 26300, Malaysia
  - <sup>5</sup> Faculty of Industrial Sciences & Technology, Universiti Malaysia Pahang, Kuantan 26300, Malaysia
- \* Correspondence: shuaib.saheed@utp.edu.my (M.S.M.S.); rjose@ump.edu.my (J.R.)

## Supporting Information

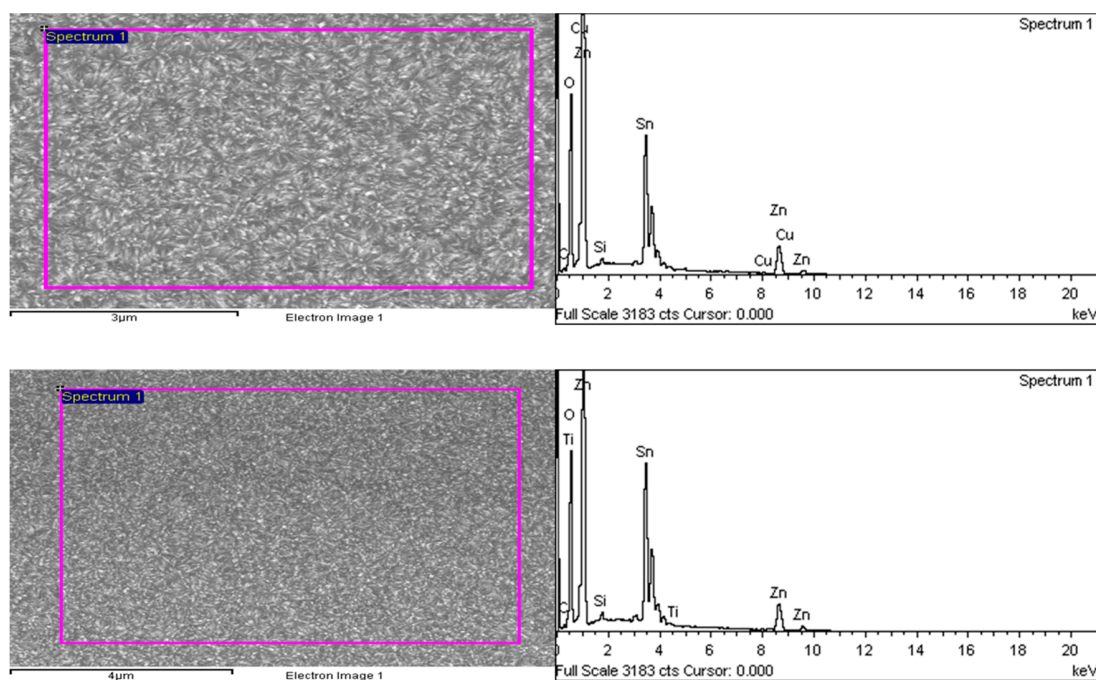

Figure S1: EDX spectrum of ZnO NFs deposited with a) Ag, b) Cu and c) Ti.
